# Supplementary material for: Cryo-electron microscopy of an extremely halophilic microbe: technical aspects
Source: Springer Nature journal article supplement (doi:10.1007/s00792-016-0912-0), 2017-01-03
Supplement: MOESM1 [file 792_2016_912_MOESM1_ESM.pdf]

## Extremophiles

### Cryo-electron microscopy of an extremely halophilic microbe: technical aspects

Daniel Bollschweiler, Miroslava Schaffer, C. Martin Lawrence, Harald Engelhardt

Max-Planck-Institut für Biochemie, Martinsried, Germany

engelhar@biochem.mpg.de

#### Online Resource 1 / Supplementary Figure

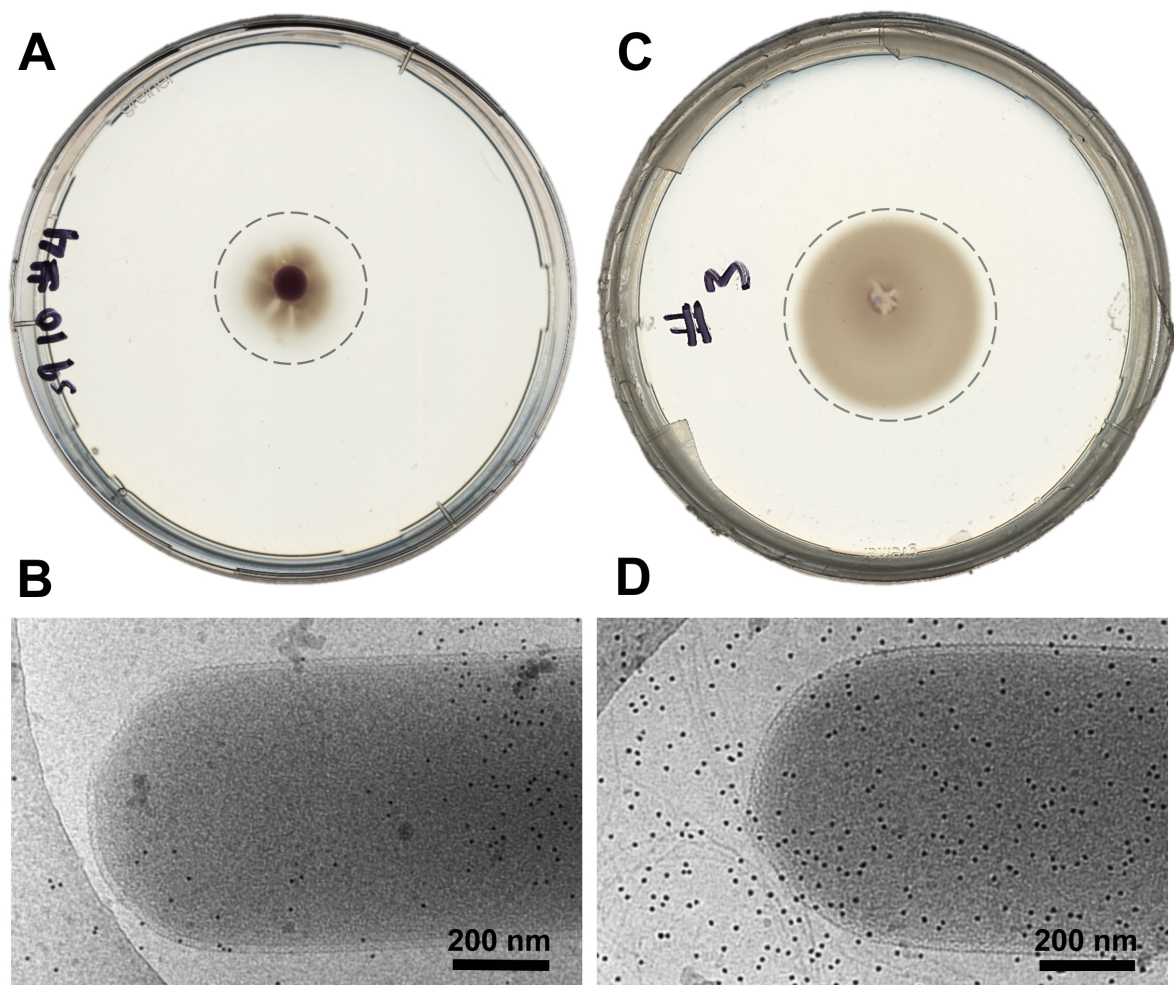

**Fig. S1** Motility and flagellation of *Halobacterium salinarum* strains. (A) Swarm agar plate incubated with strain S9 after 9 days of growth. The circle indicates the very faint border of the swarm colony. (B) Cryo-EM image of a representative cell from a sample corresponding to plate A. (C) Swarm agar plate incubated with strain SW5 selected for motile cells after 9 days of growth. (D) Cryo-EM image showing a representative cell with massive flagellation from a sample corresponding to plate C. The black dots in images B and D originate from 10 nm gold particles added to the samples.

## Online Resource 2 / Supplementary Table

Droplets of 4  $\mu$ l cell suspension of *Halobacterium salinarum* in 3 M NaCl plus 81 mM MgSO<sub>4</sub> were mixed with 4  $\mu$ l colloidal gold in the same salt solution and applied to Quantifoil Cu 200 R 2/1 grids for cryo-electron microscopy. The grids were blotted and the samples vitrified by plunge freezing. Tables S1 and S2 compile the preparation parameters and the results of vitrification for manual and Vitrobot-assisted freezing experiments, respectively.

**Table S1** Manual plunge-freezing: parameters and sample quality<sup>1)</sup>

|                                                              |                           |                               |                      |                           |                        |
|--------------------------------------------------------------|---------------------------|-------------------------------|----------------------|---------------------------|------------------------|
| Cells <sup>2)</sup> at RT <sup>3)</sup><br>prior to dialysis | 1 min to 1 h              | <10 min / 1 h                 | <1 min               | 1 h                       | 1 h                    |
| Temperature of<br>dialysis bath                              | RT / 37 °C                | RT                            | 37 °C                | RT                        | RT                     |
| Blotting from                                                | sample side               | back side                     | back side            | back side                 | back side              |
| Blotting duration                                            | ≈ 3 s / ≈ 5 s             | ≈ 3 s                         | ≈ 3 s / ≈ 5 s        | ≈ 1 s                     | >10 s                  |
| Ice quality                                                  | varying<br>thickness      | varying<br>thickness          | varying<br>thickness | very thick<br>ice         | carbon film<br>damaged |
| Sample quality                                               | very few cells<br>on grid | medium to<br>thick cell layer | few cells<br>on grid | cells almost<br>invisible | no cells               |

<sup>1)</sup> Result of 4 to 8 independent tests for each condition

<sup>2)</sup> Cell growth 72 hours throughout

<sup>3)</sup> Room temperature

### Online Resource 3 / Supplementary Table

**Table S2 Vitrobot-assisted plunge-freezing: parameters and sample quality<sup>1)</sup>**

---

|                                 |                                |                                   |                 |                                |                                    |                                                   |                                |                                     |
|---------------------------------|--------------------------------|-----------------------------------|-----------------|--------------------------------|------------------------------------|---------------------------------------------------|--------------------------------|-------------------------------------|
| Chamber humidity <sup>2)</sup>  | 0 %                            | 0 %                               | 100 %           | 100 %                          | 100 %                              | 100 %                                             | 100 %                          | 100 %                               |
| Blotting strength <sup>3)</sup> | 3 / 5                          | 10 / 15                           | 3               | 5                              | 10 / 15                            | 5                                                 | 5                              | 5                                   |
| Blotting duration               | 3 s                            | 3 s                               | 3 s             | 3 s                            | 3 s                                | 5 s                                               | 7 s                            | 9 s / 11 s                          |
| Ice quality                     | very thick ice                 | thick ice                         | very thick ice  | thick ice                      | thick ice                          | medium ice thickness                              | thin ice                       | thin to very thin ice               |
| Sample quality                  | good cell distribution on grid | cells often on carbon and damaged | cells invisible | good cell distribution on grid | cells mostly on carbon and damaged | very good cell distribution on grid <sup>4)</sup> | good cell distribution on grid | few cells on grid, cells compressed |

---

<sup>1)</sup> Result of 4 to 8 independent tests for each condition

<sup>2)</sup> Chamber at room temperature throughout

<sup>3)</sup> Numeric scale assigned to increasing angular range limit of the blotting arms

<sup>4)</sup> Best experimental parameter setting

Online Resource 4 / Supplementary Figure

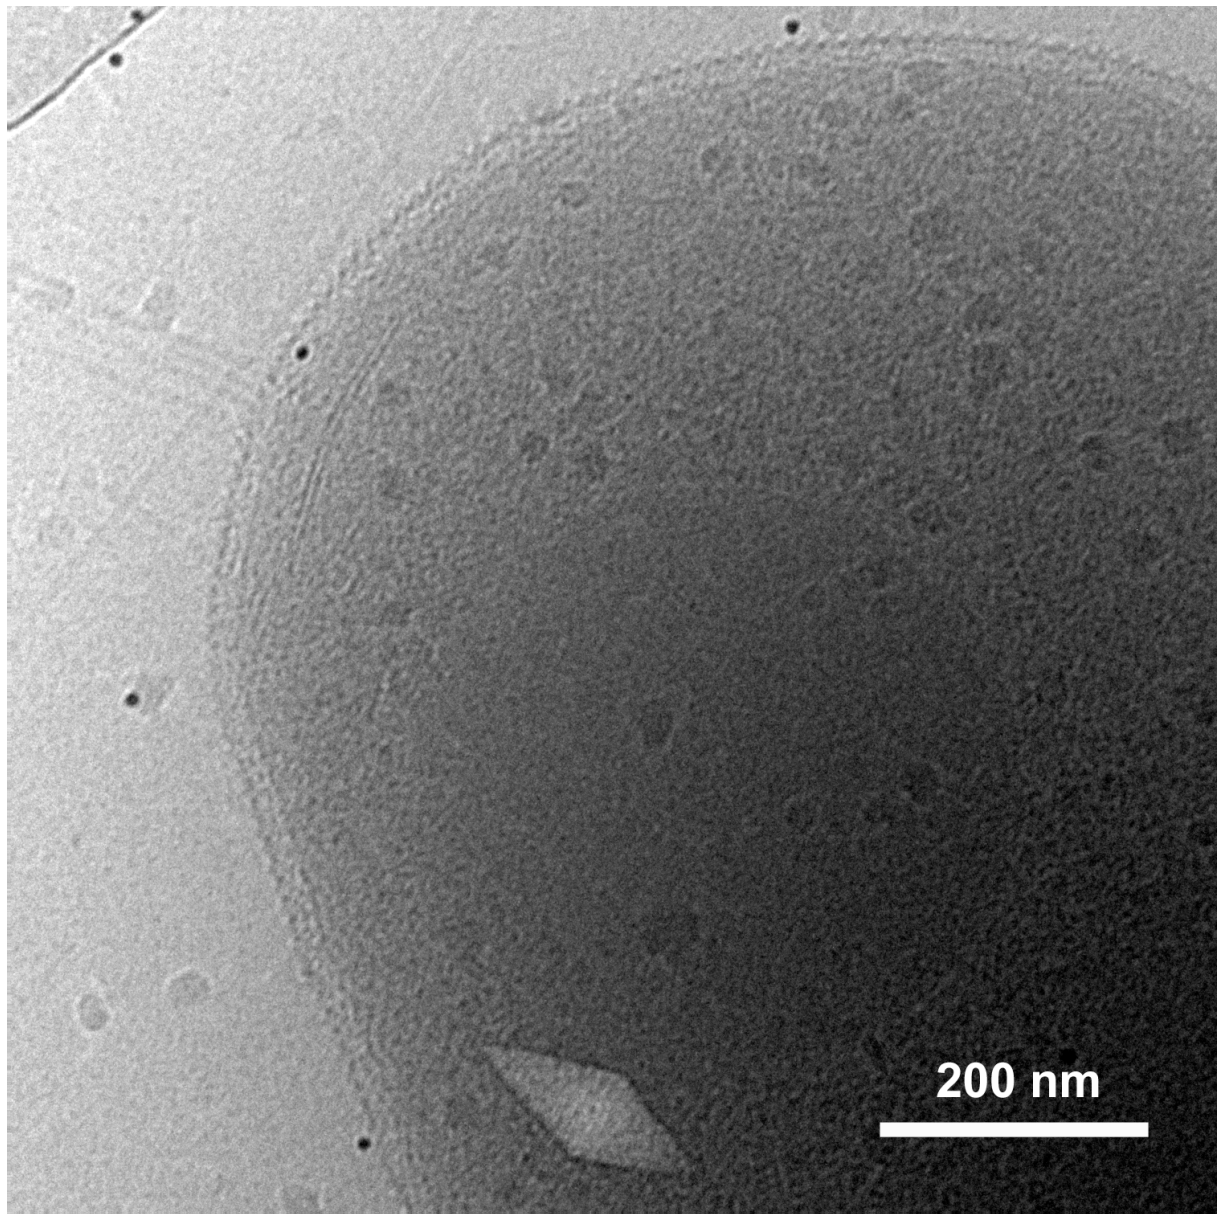

**Fig. S2** Cryo-electron micrograph of a partly lysed (flattened) cell of *Halobacterium salinarum* vitrified in a solution of 2.5 M NaCl plus 81 mM MgSO<sub>4</sub>. The S-layer, cellular membrane, a bundle of flagella and the putative polar cap structure close to the cellular origin of flagella (top left of the cell) together with a small gas vesicle below a globular granule are visible. The black dots originate from 10 nm gold particles added to the sample, the irregular gray "flakes" are ice contaminations. Projection recorded at 9  $\mu$ m underfocus.
